# Supplementary material for: Comparing Measurement Properties of the English EQ-5D-Y Three-Level Version with the Five-Level Version in South Africa
Source: Preprints.org preprint supplement (doi:10.20944/preprints202201.0285.v1), 2022-01-20
Supplement: Supplementary file 1 [file Appendix Table 1 Descriptive statistics of the sample - revi.docx]

Appendix Table 1: Descriptive statistics of the sample

|  | | Acute | | Chronic | | General  Population | | Total | |
| --- | --- | --- | --- | --- | --- | --- | --- | --- | --- |
|  | | n=129 | | n=198 | | n=223 | | n=550 | |
| n | % | n | % | n | % | n | % |
| Sex | Male | 61 | 47% | 123 | 62% | 90 | 40% | 274 | 50% |
| Age | years mean (SD) | 11.6 (1.9) | | 12.2 (1.9) | | 11.3 (1.6) | | 11.3 (1.6) | |
| Medical Condition | None | 0 | 0% | 0 | 0% | 199 | 89% | 199 | 36% |
| Physical Disability | 0 | 0% | 87 | 44% | 0 | 0% | 87 | 16% |
| Orthopaedic | 83 | 64% | 0 | 0% | 0 | 0% | 83 | 15% |
| Learning difficulty* | 0 | 0% | 95 | 48% | 0 | 0% | 95 | 17% |
| Medical | 18 | 14% | 6 | 3% | 1 | 0% | 25 | 5% |
| Respiratory, Eczema and/Allergy | 3 | 2% | 7 | 4% | 20 | 9% | 30 | 5% |
| Surgical | 13 | 10% | 0 | 0% | 0 | 0% | 13 | 2% |
| Other*ꭞ* | 12 | 9% | 3 | 0 | 3 | 1% | 18 | 3% |

**Learning difficulties includes attention deficit (hyperactive) disorder, autism spectrum disorder, dyslexia and specific learning disability. ꭞOther includes epilepsy, diabetes, and congenital cardiac lesion.*
