# Supplementary material for: Comparing Measurement Properties of the English EQ-5D-Y Three-Level Version with the Five-Level Version in South Africa
Source: Preprints.org preprint supplement (doi:10.20944/preprints202201.0285.v1), 2022-01-20
Supplement: Supplementary file 2 [file Appendix Table 2 EQ-5D-Y-3L and EQ-5D-Y-5L responses across the condition groups and for the total sample (n=550) .docx]

Appendix Table 2: EQ-5D-Y-3L and EQ-5D-Y-5L responses across the condition groups and for the total sample (n=550)

|  | | **EQ-5D-Y-5L** | | | | | | | | **EQ-5D-Y-3L** | | | | | | | | |
| --- | --- | --- | --- | --- | --- | --- | --- | --- | --- | --- | --- | --- | --- | --- | --- | --- | --- | --- |
| Acute  n=129 | | Chronic n=198 | | GP  n=223 | | Total  n=550 | | Acute  n=129 | | | Chronic n=198 | | GP  n=223 | | Total  n=550 | |
| n | % | n | % | n | % | n | % | n | % | | n | % | n | % | n | % |
| MOB | no | 44 | 34% | 111 | 56% | 205 | 92% | 360 | 65% | 48 | 37% | | 128 | 65% | 213 | 96% | 389 | 71% |
| a little bit | 24 | 19% | 46 | 23% | 15 | 7% | 85 | 15% |  |  | |  |  |  |  |  |  |
| some | 6 | 5% | 16 | 8% | 2 | 1% | 24 | 4% | 30 | 23% | | 43 | 22% | 9 | 4% | 82 | 15% |
| a lot | 3 | 2% | 2 | 1% | 0 | 0% | 5 | 1% |  |  | |  |  |  |  |  |  |
| cannot | 52 | 40% | 22 | 11% | 0 | 0% | 74 | 13% | 51 | 40% | | 25 | 13% | 0 | 0% | 76 | 14% |
| missing | 0 | 0% | 1 | 1% | 1 | 0% | 2 | 0% | 0 | 0% | | 2 | 1% | 1 | 0% | 3 | 1% |
| LAM | no | 79 | 61% | 138 | 70% | 211 | 95% | 428 | 78% | 83 | 64% | | 138 | 70% | 214 | 96% | 435 | 79% |
| a little bit | 25 | 19% | 30 | 15% | 10 | 4% | 65 | 12% |  |  | |  |  |  |  |  |  |
| some | 7 | 5% | 12 | 6% | 0 | 0% | 19 | 3% | 31 | 24% | | 45 | 23% | 9 | 4% | 85 | 15% |
| a lot | 3 | 2% | 5 | 3% | 0 | 0% | 8 | 1% |  |  | |  |  |  |  |  |  |
| cannot | 15 | 12% | 13 | 7% | 0 | 0% | 28 | 5% | 15 | 12% | | 14 | 7% | 0 | 0% | 29 | 5% |
| missing | 0 | 0% | 0 | 0% | 2 | 1% | 2 | 0% | 0 | 0% | | 1 | 1% | 2 | 1% | 3 | 1% |
| UA | no | 37 | 29% | 114 | 58% | 201 | 90% | 352 | 64% | 37 | 29% | | 124 | 63% | 209 | 94% | 370 | 67% |
| a little bit | 14 | 11% | 48 | 24% | 16 | 7% | 78 | 14% |  |  | |  |  |  |  |  |  |
| some | 9 | 7% | 22 | 11% | 0 | 0% | 31 | 6% | 32 | 25% | | 63 | 32% | 13 | 6% | 108 | 20% |
| a lot | 13 | 10% | 10 | 5% | 0 | 0% | 23 | 4% |  |  | |  |  |  |  |  |  |
| cannot | 56 | 43% | 3 | 2% | 0 | 0% | 59 | 11% | 60 | 47% | | 9 | 5% | 1 | 0% | 70 | 13% |
| missing | 0 | 0% | 1 | 1% | 6 | 3% | 7 | 1% | 0 | 0% | | 2 | 1% | 0 | 0% | 2 | 0% |
| P/D | no | 58 | 45% | 117 | 59% | 168 | 75% | 343 | 62% | 70 | 54% | | 120 | 61% | 174 | 78% | 364 | 66% |
| a little bit | 43 | 33% | 45 | 23% | 38 | 17% | 126 | 23% |  |  | |  |  |  |  |  |  |
| some | 16 | 12% | 27 | 14% | 13 | 6% | 56 | 10% | 49 | 38% | | 71 | 36% | 47 | 21% | 167 | 30% |
| a lot | 9 | 7% | 6 | 3% | 2 | 1% | 17 | 3% |  |  | |  |  |  |  |  |  |
| extreme | 3 | 2% | 1 | 1% | 1 | 0% | 5 | 1% | 10 | 8% | | 7 | 4% | 2 | 1% | 19 | 3% |
| missing | 0 | 0% | 2 | 1% | 1 | 0% | 3 | 1% | 0 | 0% | | 0 | 0% | 0 | 0% | 0 | 0% |
| WSU | no | 73 | 57% | 113 | 57% | 162 | 73% | 348 | 63% | 79 | 61% | | 119 | 60% | 168 | 75% | 366 | 67% |
| a little bit | 38 | 29% | 54 | 27% | 44 | 20% | 136 | 25% |  |  | |  |  |  |  |  |  |
| some/quite | 8 | 6% | 15 | 8% | 8 | 4% | 31 | 6% | 42 | 33% | | 68 | 34% | 51 | 23% | 161 | 29% |
| really | 7 | 5% | 3 | 2% | 2 | 1% | 12 | 2% |  |  | |  |  |  |  |  |  |
| extremely | 3 | 2% | 8 | 4% | 2 | 1% | 13 | 2% | 8 | 6% | | 11 | 6% | 4 | 2% | 23 | 4% |
| Missing | 0 | 0% | 5 | 3% | 5 | 2% | 10 | 2% | 0 | 0% | | 0 | 0% | 0 | 0% | 0 | 0% |
| VAS | mean (SD) | 67.7 (28.2) | | 84.1 (19.8) | | 89.1 (14.5) | | 82.2 (22.0) | | 71.2 (28.5) | | 83.9 (20.5) | | | 89.8 (14.1) | | 83.2 (21.9) | |
| missing | 0 | 0% | 5 | 3% | 3 | 1% | 8 | 1% | 0 | 0% | | 18 | 9% | 12 | 5% | 30 | 5% |
| LSS | mean (SD) | 11.6 (4.6) | | 8.4 (3.5) | | 15.5 (5.8) | | 8.1 (3.9) | | 8.7 (2.6) | | | 7.1 (2.0) | | 5.6 (1.0) | | 6.9 (2.2) | |

Mob: Mobility; LAM: Looking After Myself; UA: Doing Usual Activities; P/D: Having Pain or Discomfort; WSU: Feeling Worried, Sad or Unhappy
